# Supplementary material for: Neoadjuvant Triplet Immune Checkpoint Blockade in Newly Diagnosed Glioblastoma
Source: Research Square preprint supplement (doi:10.21203/rs.3.rs-4255559/v1), 2024-04-29
Supplement: Supplementary file 1 [file 3e6ee0232e638083d27ac0c4.docx]

**CDSupplementary Information**

**Table of Contents**

**1. Supplementary Results**

- 1. Patient presentation and initial treatment
  2. Pathology Report Initial Biopsy Specimen Day -4
  3. Pathology Report Safe Maximal Resection Specimen Day +13

**2. Supplementary Tables**

1. Table S1: Whole Genome Sequence Summary - Biopsy (Day -4) specimen
2. Table S2: Chronological details of treatment schedule
3. Table S3: Normalized Olink proteomics data expressed as normalised expression units (NPX) on log2 scale

**3. Supplementary Figures**

1. Figure S1. Identification of circulating tumor cells
2. Figure S2. Flow cytometry analysis of tumor samples
3. Figure S3. Flow cytometry analysis of circulating T cells

**4. Supplementary Methods**

- 1. Next Generation Sequencing
  2. Flow Cytometry Analysis
  3. Phenocycler Fusion Tissue Imaging and Analysis
  4. TCR Pan-clonality Assay
  5. Proximity Extension Assays
  6. Circulating Tumor Cell Analysis

**5. References**

**Supplementary Results**

**Patient presentation and initial treatment**

The patient presented with a generalized seizure and was treated initially with intravenous (IV) diazepam. He underwent magnetic resonance imaging (MRI) brain, electroencephalogram (EEG), lumbar puncture, and standard blood analyses, which revealed a left temporal lobe pole mass (T2-weighted area measuring 48x23x26mm with diffusion restriction and foci of contrast-enhancement measuring 7x3x5mm), frontal intermittent rhythmic delta activity over the left temporal lobe and no pathogens. He was treated with levetiracetam (750mg orally, twice daily) and IV aciclovir (750mg three times daily for 14 days) for a possible differential diagnosis of viral encephalitis.

**Pathology Report Initial Biopsy Specimen Day -4**

**MACROSCOPIC DESCRIPTION**

1. "LEFT TEMPORAL LESION"

A piece of tan tissue received, 15x9x6mm

2. ""LEFT TEMPORAL ENHANCING LESION"

Nine fragments of soft grey tissue, between 3 and 5mm

**MICROSCOPIC REPORT**

Specimens 1 & 2 contain similar histological features and are described together. Both show a highly pleomorphic, diffusely infiltrative astrocytic glioma.

The tumour shows variable cellularity. In much of specimen 1, the tumour is moderately hypercellular, however, in some fragments in specimen 1 and in much of specimen 2 it shows marked hypercellularity. The tumour cells are pleomorphic, with a component of large atypical multinucleate giant cells. The tumour demonstrates variable morphology elsewhere, including areas where cells with gemistocytic morphology predominate, and others where there are intermediate sized atypical cells with astrocytic morphology. Rare foci of perivascular accumulation show some perivascular pseudorosette-like changes, although these changes are not widespread. Very focal microcalcification is seen in the form of psammoma-like bodies. Accompanying the tumour is a perivascular lymphocytic infiltrate noted in scattered intratumoural vessels.

The tumour involves both cortex and subcortical white matter. In the cortex, there is marked perineuronal satellitosis as well as subpial and perivascular accumulation. There is tumour encircling leptomeningeal vessels. This may represent focal leptomeningeal invasion, although this change is only seen at the surgical margin and may represent surgical artefact. Correlation with imaging and intraoperative findings is required.

There is no microvascular proliferation. There is no evidence of necrosis. Mitoses are present, with mitotic activity seen at up to 8-10 per 10 high-power fields (field diameter 0.58mm).

Immunohistochemistry was performed and the results are as follows:

IDH1(R132H): negative.

BRAF(V600E): negative.

ATRX: retained nuclear staining (normal pattern).

NeuN: stains cortical pyramidal neurons.

Synaptophysin: no significant tumour cell staining.

GFAP: stains the majority of tumour cells.

p53: moderate to strong nuclear staining in the majority of tumour cells, especially giant cells.

EGFR: moderate cytoplasmic and variable membranous staining.

H3K27M: negative.

H3K27me3: retained nuclear staining (normal pattern).

Olig2: positive nuclear staining in many tumour cells.

MAP2: strong background neuropil staining and variable staining of some tumour cells.

CD163: highlights numerous parenchymal and perivascular microglia.

CD68: stains some parenchymal and perivascular microglia / macrophages.

CD3: positive staining of moderate numbers of perivascular lymphocytes and occasional parenchymal lymphocytes.

CD20: stains roughly equal numbers of perivascular lymphocytes as CD3.

CD4: stains the majority of CD3+ perivascular lymphocytes.

CD8: stains a minority of perivascular CD3+ lymphocytes.

CD34: scattered staining of occasional tumour cells, remote from areas of NeuN staining.

Ki-67 labelling index (Blocks 1B & 2D): ~20-30%

Reticulin histochemistry: no increased parenchymal reticulin seen.

Mismatch repair immunohistochemistry was also performed. The results are as follows:

MLH1: Normal pattern of staining (retained nuclear staining)

PMS2: Normal pattern of staining (retained nuclear staining)

MSH2: Normal pattern of staining (retained nuclear staining)

MSH6: Normal pattern of staining (retained nuclear staining)

*** Please note that the degree of staining meets the criteria for normal pattern of staining as defined in other sites, e.g. CAP protocol for Colon and Rectum Biomarker template 2018. Thresholds for staining have not yet been clearly defined in glioma; one recent paper describes a heterogenous pattern of MMR protein immunostaining in four of eight hypermutated gliomas.15 Further investigation for the presence of microsatellite instability may be considered if clinically appropriate.

**COMMENT**

The tumour is a pleomorphic, mitotically active, diffusely infiltrative astrocytic glioma with negative IDH1(R132H) immunohistochemistry and retained nuclear ATRX stain. In a patient of this age, this staining pattern is indicative of an IDH-wildtype diffuse astrocytic glioma. The presence of mitotic activity and the absence of necrosis and microvascular proliferation would be in keeping with a histological grade of 3.

Pyrosequencing for *TERT* promoter mutations and *IDH1* and *IDH2* variant mutations has been performed. No *IDH1* codon 132 or *IDH2* codon 172 mutation has been detected, however, there is a *TERT* promoter mutation (C228T). Therefore, the molecular phenotype of the tumour fulfils the CNS WHO 5 (2021) diagnostic criteria for a glioblastoma, IDH-wildtype, CNS WHO grade 4.

The presence of variably prominent giant cells raises the possibility of a giant cell variant of an IDH-wildtype glioblastoma. There are some supportive features of this, namely perivascular lymphocytosis, focal perivascular pseudorosette-like structures, as well as strong p53 staining. However, the giant cells are not a “dominant” feature. Given the presence of giant cells, screening of mismatch repair enzyme deficiency was performed, however all four immunohistochemical stains showed a normal pattern of retained nuclear staining.

*MGMT* promoter methylation testing has been performed. The tumour is UNMETHYLATED at the *MGMT* promoter region.

**Pathology Report Safe Maximal Resection Specimen Day +13**

**MACROSCOPIC DESCRIPTION**

1. "LEFT TEMPORAL LESION FRESH"

A piece of tan tissue 35x30x8mm with smooth cortex and leptomeninges seen. A few smaller fragments measuring in aggregate 6x4x2mm

2. "LEFT AMYGDALA FRESH"

Two pieces of tan tissue, 8x4x2mm and 6x4x2mm as well as a small fragment 2mm.

**MICROSCOPIC REPORT**

Specimens 1 & 2 contain similar histological features and are described together. The specimen was reviewed in conjunction with the previous resection.

The sections show cortex and subcortical white matter, in which the tumour demonstrates a spectrum of cellularity. The most cellular fragments appear morphologically similar to the previous resection, which comprises a minority of the specimen submitted. However there are very few giant/multinucleate tumour cells in this resection, and there are areas showing typical small cell morphology with associated microcalcifications, The remainder of the specimen shows less cellular but diffusely infiltrative tumour, with perineuronal satellitosis and prominent subpial aggregation noted.

Mitotic activity is difficult to find in the specimen. There is no necrosis or microvascular proliferation present.

Perivascular lymphocytic cuffing is present around many blood vessels. The cuffs are of similar or smaller size compared to the biopsy specimen. However immunohistochemistry for CD3 highlights significantly increased parenchymal T-lymphocytes compared to the previous biopsy, which were difficult to identify on H&E-stained sections. In both perivascular and parenchymal locations the T-lymphocytes are a mix of CD4 and CD8 subtypes, with CD4 slightly predominating over CD8 cells. CD20 highlights relatively similar numbers of B cells compared to the previous biopsy (less than CD3+ T-cells), almost all in the perivascular cuffs.There are also small numbers of leptomeningeal lymphocytes present in this specimen, not seen in the previous biopsy.

CD163, CD68 and CD4 highlight a similar density of tumour-associated microglia/macrophages compared to the prior biopsy. The density is high in both specimens.

The previous operative site is represented in (1) - with some organising tissue with macrophages.

Specimen 2 (left amygdala) is diffusely infiltrated by glioblastoma at low and moderate tumour cellularity, with morphologically similar lymphocytic infiltrate to Specimen 1.

EGFR immunohistochemistry was performed on blocks 2A and 2B (amygdala). There is strong and diffuse EGFR immunoreactivity seen in all tumour cells. This finding is consistent with the molecular identification of *EGFR* gene amplification.

**Supplementary Tables**

**Table S1 Whole Genome Sequence Summary – Biopsy (Day -4) specimen**

| Gene | Molecular Findings | Metrics |
| --- | --- | --- |
| *EGFR* | Focal amplification - chr7:52,854,346-55,496,211 | 27 copies |
| *MDM4* | Focal amplification - chr1:203,782,401-205,051,916 | 48 copies |
| *TERT* | Promoter hotspot mutation - chr5: g.1,295,113 G>A | 25% AF |
| *PTEN* | Homozygous deletion -chr10:87,781,809-89,093,511 | 68% AF |
| *EGFR* | Intragenic deletion on chr7. Breakpoints at chr7:55,155,233 between ENST00000275493.6 exons 7 and 8, and chr7:55,160,268 within exon 12. Predicted effect: uncertain. | 8% AF |
| *RB1* | Intrachromosomal rearrangement on chr13. Breakpoint at chr13:48,311,600 between ENST00000267163.4 exons 2 and 3. Predicted effect: Inactivation 1 of 1 gene copy. | 85% AF |
| *RB1* | Intrachromosomal rearrangement on chr13. Breakpoint at chr13:48,320,255 between ENST00000267163.4 exons 2 and 3. Predicted effect: Inactivation 1 of 1 gene copy. | ND |

AF, variant allele frequency; ND, not determined

**Table S2 Chronological details of treatment schedule**

| Week | Day | Description | Details |
| --- | --- | --- | --- |
| 1 | +1 | Cycle 1 of ICI | Nivolumab 480 mg plus relatlimab 160 mg  Ipilimumab 80 mg |
| 2 | +13 | Subtotal resection |  |
| 5 | +35 | First day of Rx | 30x (daily) at 60Gy |
| 6 | +47 | Cycle 2 of ICI | Nivolumab 480 mg |
| 10 | +75 | Cycle 3 of ICI | Nivolumab 40 mg plus relatlimab 160 mg |
| +76 | Last day of Rx | 30x (daily) at 60Gy |
| 13 | +91 | Dose 1 of Vx | Personalised peptide vaccine |
| +95 | Cycle 4 of ICI | Ipilimumab 80 mg |
| 15 | +105 | Dose 2 of Vx | Personalised peptide vaccine |
| +109 | Cycle 5 of ICI | Nivolumab 480 mg plus relatlimab 160 mg |
| 16 | +118 | Dose 3 of Vx | Personalised peptide vaccine |
| 17 | +119 | Cycle 6 of ICI | Ipilimumab 80 mg |
| 18 | +132 | Dose 4 of Vx | Personalised peptide vaccine |
| 19 | +138 | Cycle 7 of ICI | Nivolumab 480 mg plus relatlimab 160 mg |
| 21 | +147 | Dose 5 of Vx | Personalised peptide vaccine |
| 23 | +161 | Dose 6 of Vx | Personalised peptide vaccine |
| 24 | +169 | Cycle 8 of ICI | Ipilimumab 80 mg |
| 25 | +181 | Cycle 9 of ICI | Ipilimumab 80 mg |
| 28 | +202 | Cycle 10 of ICI | Nivolumab 480 mg plus relatlimab 160 mg  Ipilimumab 80 mg |
| 30 | +211 | Dose 7 of Vx | Personalised peptide vaccine |
| 33 | +235 | Cycle 11 of ICI | Nivolumab 480 mg plus relatlimab 160 mg  Ipilimumab 80 mg |
| 37 | +263 | Cycle 12 of ICI | Nivolumab 480 mg plus relatlimab 160 mg  Ipilimumab 80 mg |
| 42 | +301 |  | Personalised peptide vaccine |

Personalised peptide vaccine administered to 42 weeks in 8 doses (Q2W for the first 6 doses, Q4W for dose 7, and Q12W for dose 8).

Abbreviations: ICI, immune checkpoint inhibitor; Rx, radiotherapy; Vx, vaccine therapy.

**Table S3 Normalized Olink proteomics plasma data expressed as normalised expression units (NPX) on log2 scale**

| Protein | PRE (Day -4) | POST (Day +7) | POST (Day +12) | Log2 FC POST (+7)-PRE (-4) | Log2 FC POST (+12)-PRE (-4) |
| --- | --- | --- | --- | --- | --- |
| AXIN1 | 0.25 | 3.15 | 1.81 | 2.90 | 1.56 |
| BACH1 | 0.67 | 2.07 | 1.70 | 1.40 | 1.03 |
| BANK1 | 0.48 | 3.91 | 2.53 | 3.43 | 2.05 |
| BCR | 0.14 | 2.23 | 1.31 | 2.09 | 1.17 |
| CDKN1A | -0.46 | 2.11 | 1.03 | 2.57 | 1.49 |
| CES3 | 1.18 | 0.14 | -0.29 | -1.04 | -1.47 |
| CLIP2 | 0.34 | 3.24 | 2.39 | 2.90 | 2.05 |
| CXCL10 | -0.51 | 0.96 | 3.22 | 1.47 | 3.73 |
| CXCL9 | -0.84 | 1.11 | 2.91 | 1.95 | 3.75 |
| FOXO1 | 0.51 | 2.17 | 1.74 | 1.66 | 1.23 |
| GCG | -2.13 | 2.56 | -0.78 | 4.69 | 1.35 |
| GOPC | 0.58 | 3.04 | 1.82 | 2.46 | 1.24 |
| HBEGF | -1.82 | 0.23 | -0.09 | 2.05 | 1.73 |
| ICA1 | 0.02 | 1.82 | 1.34 | 1.80 | 1.32 |
| IFNG | -0.11 | 3.04 | 6.00 | 3.15 | 6.11 |
| IKBKG | 0.43 | 2.68 | 2.01 | 2.25 | 1.58 |
| IL10 | 0.91 | 3.02 | 5.9 | 2.11 | 4.99 |
| IL12A_IL12B | 0.28 | 1.77 | 3.35 | 1.49 | 3.07 |
| IL12B | 0.15 | 1.23 | 2.20 | 1.08 | 2.05 |
| IL1B | -0.54 | 0.62 | 1.25 | 1.16 | 1.79 |
| IL5 | -1.69 | 0.38 | -0.42 | 2.07 | 1.27 |
| IL6 | -3.17 | -0.64 | 2.14 | 2.53 | 5.31 |
| INPPL1 | 0.04 | 3.21 | 2.10 | 3.17 | 2.06 |
| IRAK4 | 0.56 | 3.34 | 1.78 | 2.78 | 1.22 |
| LAG3 | 0.03 | 3.67 | 4.93 | 3.64 | 4.9 |
| MGMT | -1.19 | 1.16 | 0.07 | 2.35 | 1.26 |
| MMP12 | -0.71 | 0.43 | 1.35 | 1.14 | 2.06 |
| NFATC1 | 0.27 | 2.74 | 1.47 | 2.47 | 1.20 |
| NPY | -0.40 | 1.70 | 1.00 | 2.10 | 1.40 |
| NTF3 | 0.67 | -0.62 | -0.96 | -1.29 | -1.63 |
| NUB1 | 0.23 | 1.6 | 1.45 | 1.37 | 1.22 |
| PDCD1 | -0.10 | 2.84 | 3.84 | 2.94 | 3.94 |
| PPP1R12A | 0.68 | 2.72 | 2.07 | 2.04 | 1.39 |
| PPP1R9B | 0.52 | 2.14 | 1.88 | 1.62 | 1.36 |
| PRKRA | 0.07 | 1.48 | 1.41 | 1.41 | 1.34 |
| PSIP1 | -0.14 | 1.16 | 1.10 | 1.30 | 1.24 |
| PTPN6 | 0.54 | 2.26 | 1.76 | 1.72 | 1.22 |
| S100A12 | 0.19 | 1.43 | 1.50 | 1.24 | 1.31 |
| SH2B3 | 0.23 | 3.47 | 1.95 | 3.24 | 1.72 |
| SMOC1 | -1.01 | 1.02 | 1.15 | 2.03 | 2.16 |
| SPRY2 | -0.34 | 0.87 | 0.90 | 1.21 | 1.24 |
| TANK | 0.63 | 1.88 | 1.73 | 1.25 | 1.10 |
| TP53 | -0.58 | 1.13 | 0.81 | 1.71 | 1.39 |
| TRIM5 | -0.27 | 1.68 | 1.01 | 1.95 | 1.28 |

Pre-treatment (Day –4) and post-treatment (Day +7 and +12) plasma samples collection time points shown relative to neoadjuvant immune checkpoint inhibitor (ICI) therapy initiation (Day +1). Proteins showing a >2-fold change at Day +7 and Day +12 are shown. FC, fold change.

**Supplementary Figures**

**
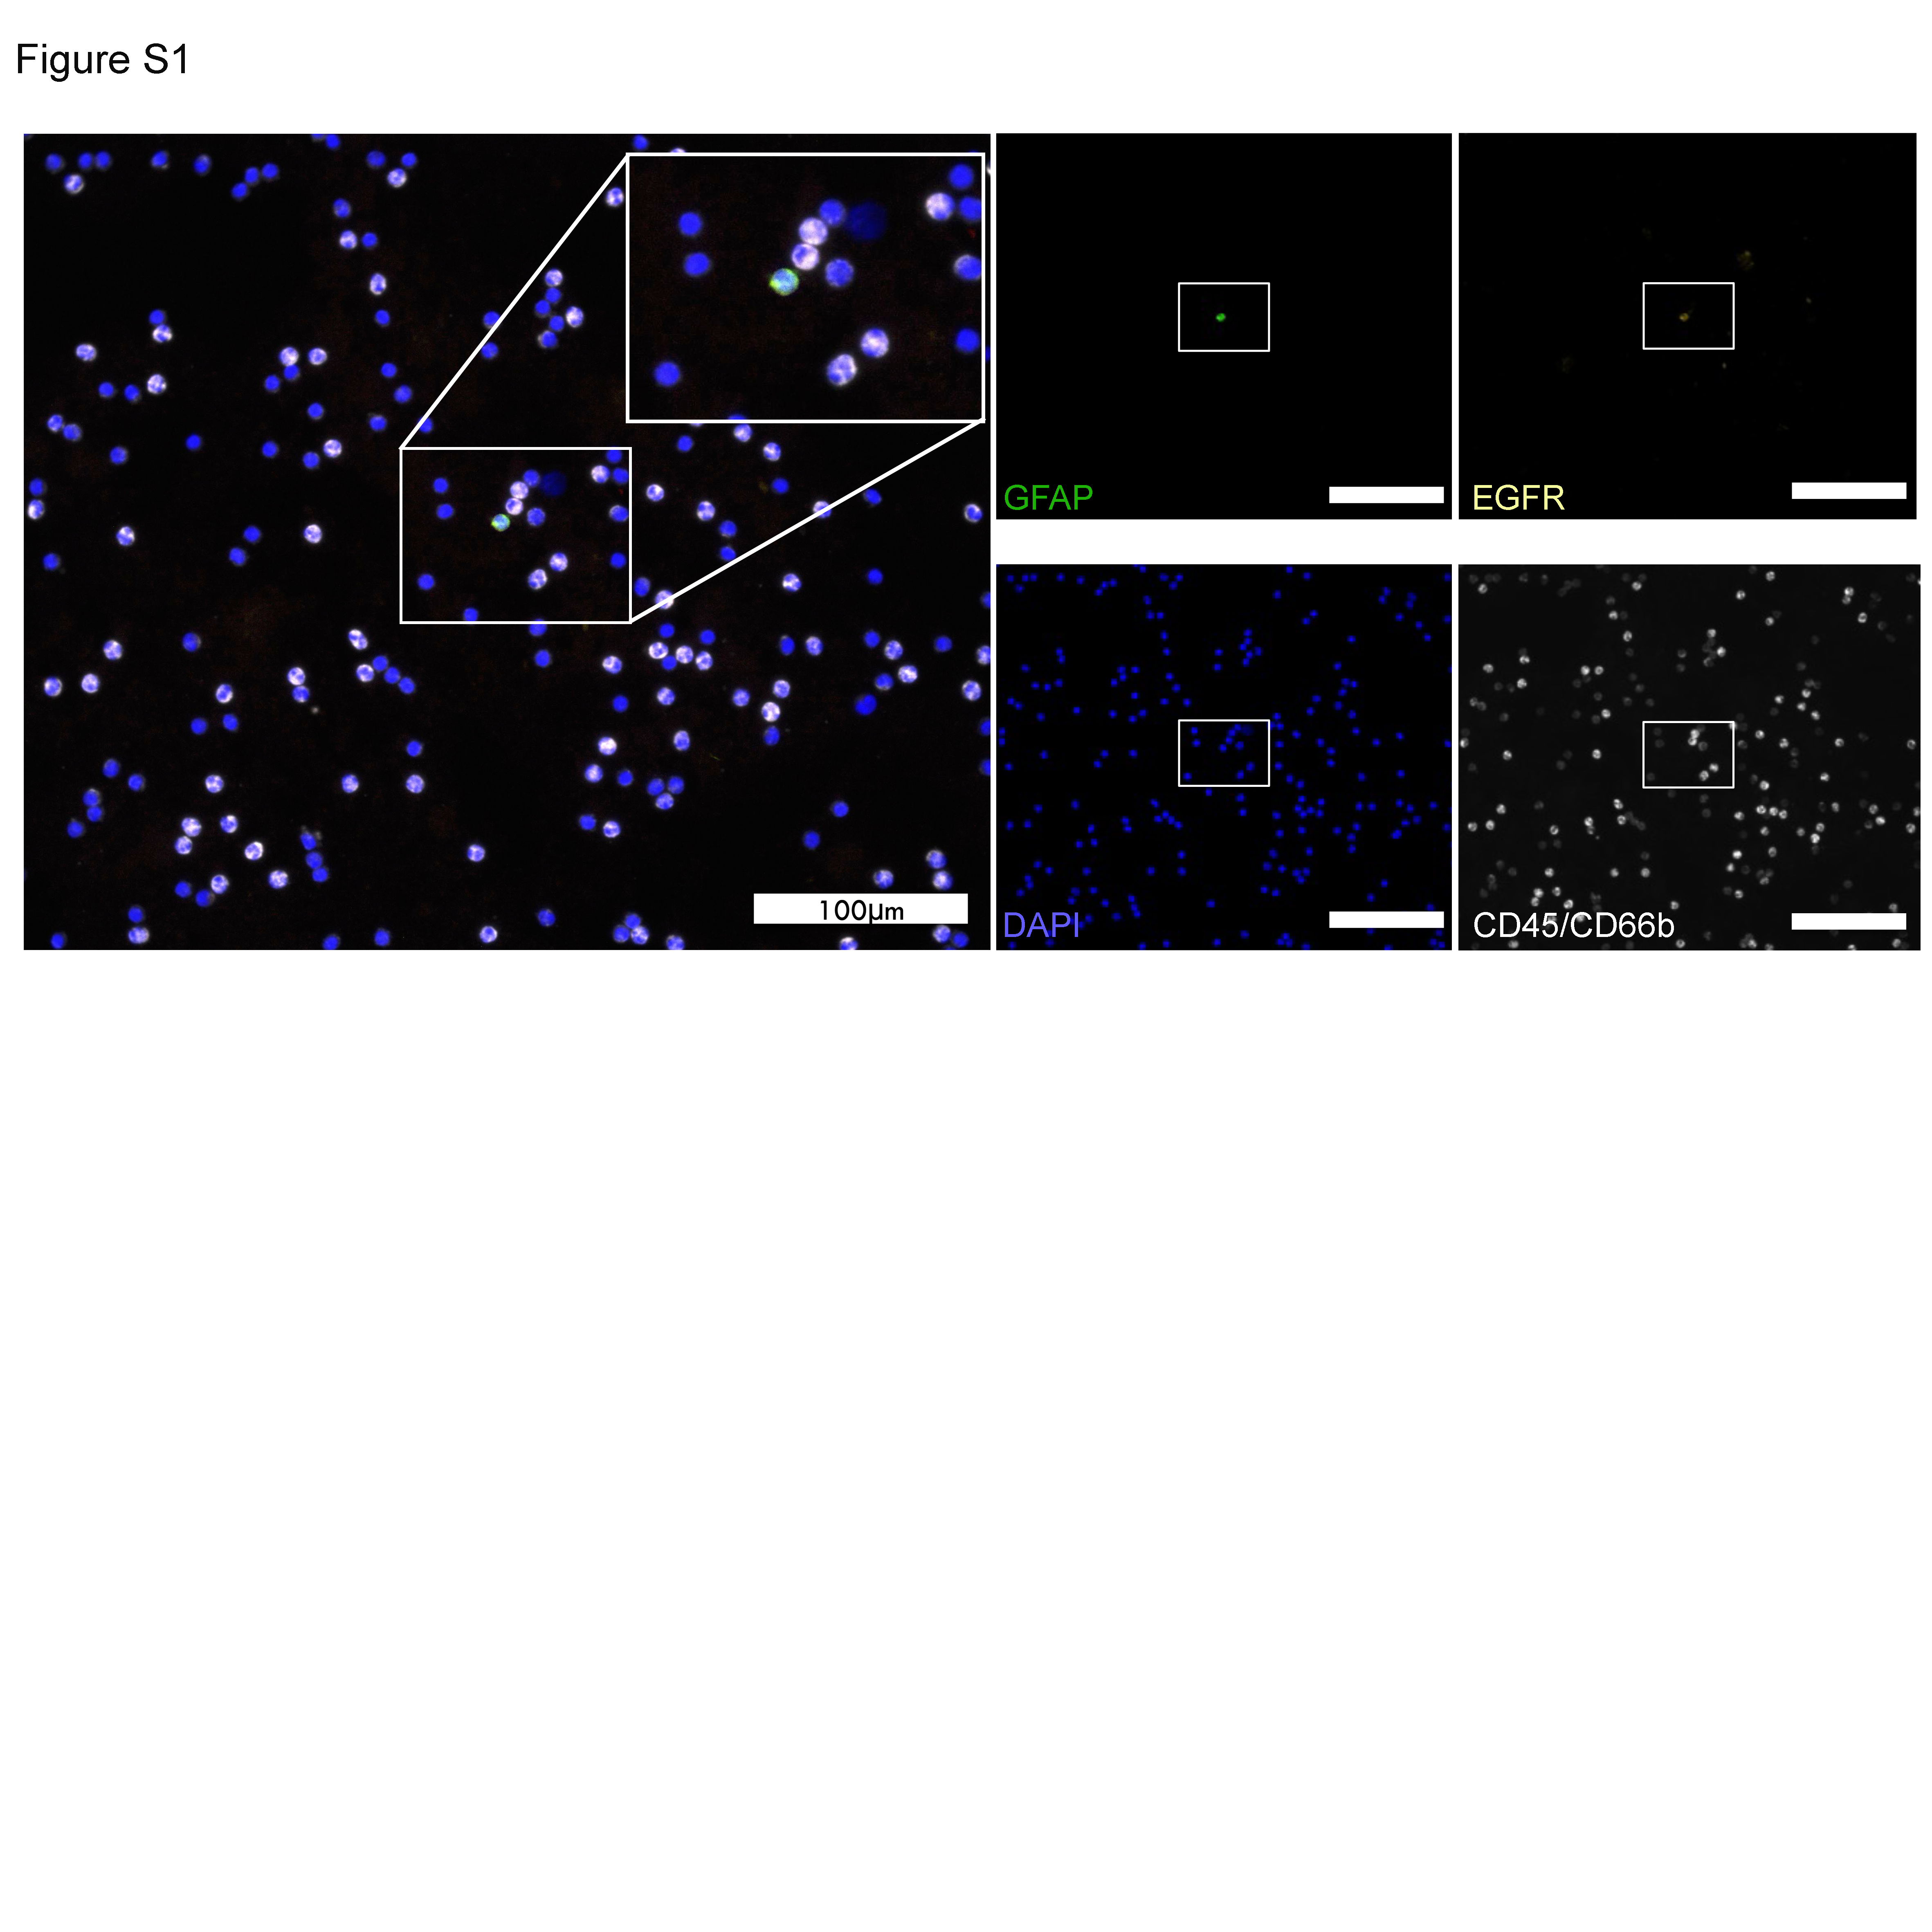
**

**Figure S1. Identification of circulating tumor cells.**

Representative image of a circulating tumor cell (CTC, boxed) identified in a GBM patient stained for GFAP (green), EGFR (yellow), CD45/CD66b (white) and nuclear DAPI (blue). Magnification = 40X; scale bar = 100mm. Sample collected pre-ICI, Day -8.

**
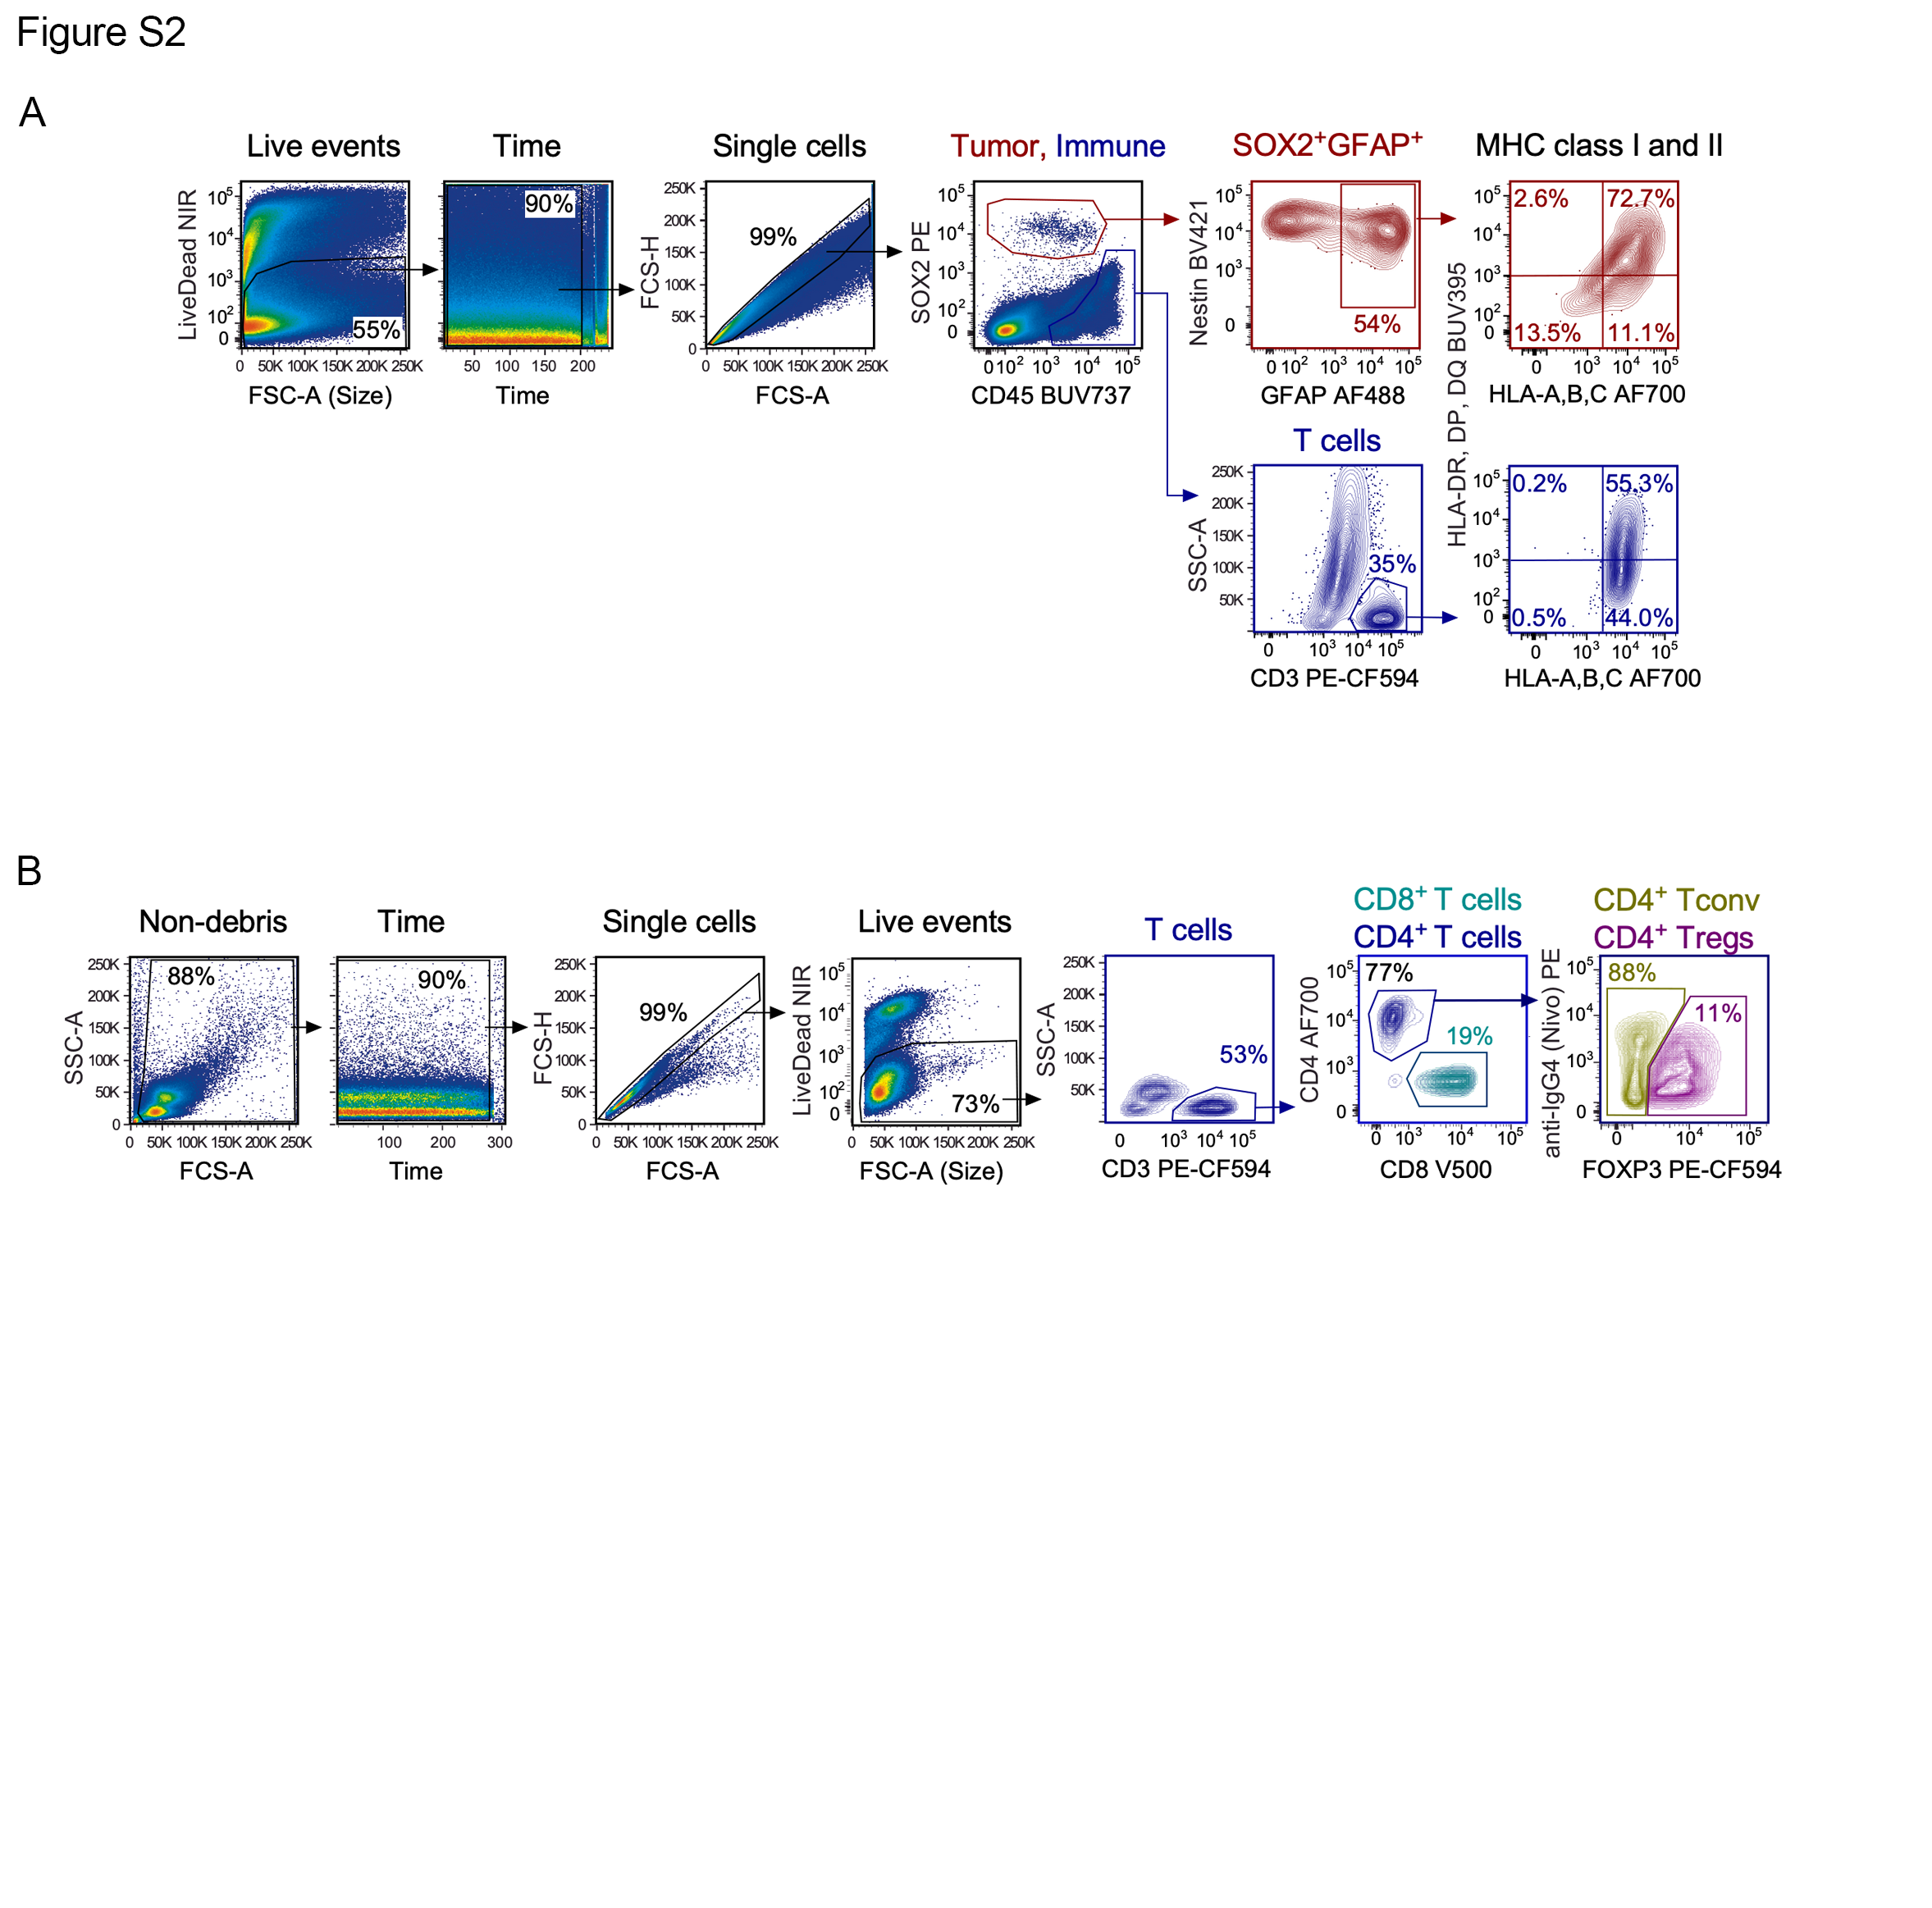
 Figure S2. Flow cytometry analysis gating strategy**

A) General gating strategy for tumor dissociates. Left to right: a viability gate to exclude dead cells, a time gate to exclude electronic noise, a singlet gate to exclude doublets, tumor and immune fraction gates to define the cells of interest. Tumor cells (SOX2+) were further gated for the GFAP+ fraction and analysed for MHC class I (HLA-A, B, C) and MHC class II (HLA-DR, DP, DQ) expression. Numbers indicate percent of cells within the respective gates. T-cell analysis is shown for comparison.

B) General gating strategy for PBMC samples. Left to right: a debris exclusion gate, a time gate to exclude electronic noise, a singlet gate to exclude doublets, a viability gate to exclude dead cells. T cells were defined as CD3+ SSC-A-low and gated for CD8+ T cells (CD3+ CD8+), conventional CD4+ T cells (Tconv:CD3+ CD4+ FOXP3–), and Tregs (CD3+ CD4+ FOXP3+).

**Supplementary Methods**

**Next Generation Sequencing and transcriptome analysis**

Whole genome sequencing was performed on patient-matched normal and tumour DNAs using the Illumina NovaSeq 6000 platform, as previously described.1 Briefly, the Advanced Genomic Collaboration (TAGC) Clinical Genomics Analysis Platform was used to perform genome alignment (hg38) and variant calling using DRAGEN3.9, copy number variation using PURPLE & structural rearrangement detectionvia DRAGEN SV and *breakpointinspector* packages.

For whole transcriptome sequencing of ribo-depleted total RNA was performed using the NEBNext Ultra II Directional RNA Library Prep kit for Illumina and Novaseq 6000 platform, to a minimum depth of 60 million paired 150bp reads. RNA sequence alignment, quantification and fusion detection was performed using the DRAGEN Bio-IT Platform V3.9.3 (Illumina). Total RNA samples were used as input for the NanoString IO360Panel and run on the nCounter MAX/FLEX prep station and scanner as previously described{Mao, 2023 #45}. Data normalisation and calculation of signature scores was performed using the signscore method {Foroutan, 2018 #44;Mao, 2023 #45}.

**Flow Cytometry Analysis**

Flow cytometry staining was performed as previously described. 2 **Briefly, viable cryopreserved tumor or PBMC samples were thawed and stained with fluorophore-conjugated antibodies against CD45 (BUV737; 1/200; clone HI30, Cat.** 748719; RRID AB_2873123), CD45RA (BUV737; 1/100; clone HI100, Cat. 564442; RRID AB_2738810), CD45RO (BUV395; 1/20; clone UCHL1, Cat. 564291; RRID AB_2744410), CD3 (PE-CF594; 1/100; clone UCHT1, Cat. 562280; RRID AB_11153674), CD3 (BV786; 1/100; clone UCHT1, Cat. 565491; RRID AB_2739260), HLA-DR, DP, DQ (BUV395; 1/200; clone Tu39, Cat. 740302; RRID AB_2740041), CD8 (V500; 1/100; clone SK1, Cat. 561617; RRID AB_10896281), CD134 (OX40, PE-Cy7; 1/20; clone Ber-ACT35, Cat. 563663; RRID AB_2738358), **all from** BD Biosciences; HLA-A, B, C (AF700; 1/80; clone W6/32, Cat. 311438; AB_2566306), CD4 (AF700; 1/40; clone A161A1, Cat. 357418; RRID AB_2616933); HLA-DR (FITC; 1/100; clone L243, Cat. 307604; RRID AB_314682), **all from BioLegend; CD223 (LAG3; PE; 1/11; clone REA351, Cat. 130-105-452, Miltenyi Biotech; RRID AB_2656407). Non-specific staining was blocked with Fc block (1/200; clone Fc1, Cat. 564220; BD Biosciences; RRID AB_2728082). For the detection of T-cell bound Nivolumab, cells were incubated with human IgG4Fc (PE; 1/100; clone HP6025, Cat. 9200-09; Southern Biotech; RRID AB_2796693). For direct PD1 detection, cells were stained with** CD279 (PD1; BV421; 1/50; clone EH12.1; Cat. 562516; BD Biosciences; RRID AB_11153482). Cell viability was determined by staining cells with LiveDead near-infrared (NIR) fixable dye (Cat. L34976; Invitrogen, ThermoFisher Scientific).

Following cell surface staining, cells were fixed and permeabilized using the eBioscience transcription factor buffer kit (Cat. 00-5523-00, ThermoFisher Scientific), and stained with the following antibodies plus Fc block in permeabilization buffer: FOXP3 (PE-CF594; 1/20; clone 236A/E7; Cat. 563955; RRID AB_2738507), GFAP (AF488; 1/20; clone 1B4; Cat. 560297; RRID AB_1645350), Granzyme B (AF700; 1/100; clone GB11; Cat. 560213; RRID AB_1645453), SOX2 (PE; 1/100; clone O30-678; Cat. 562195; RRID AB_10895118), all from BD Biosciences; CD152 (CTLA-4; APC; 1/20; clone 14D3; Cat. 17-1529-42; RRID AB_2688162), KI-67 (APC; 1/150; clone 20Raj1; Cat. 17-5699-42; RRID AB_2573218), both from ThermoFisher Scientific. Samples were washed extensively and immediately acquired on BD LSR-II FortessaX20 flow cytometer (BD Biosciences). Samples were analyzed with FlowJo software v10.8 (BD Biosciences).

**PhenoCyler-Fusion Tissue Imaging and Analysis**

Antibodies targeting the tumour and non-tumour cells in the tumour microenvironment were conjugated to short DNA oligonucleotides and titrated according to the manufacturer’s instructions (Akoya Biosciences)3 antigens shown in this study include CD14 (AKYP0079, Akoya Biosciences), CD11c (AKYP0051), CD141 (AKP0124), CD3 (AKYP0062), CD8 (AKYP0028), CD4 (AKYP0048), FOXP3 (AKYP0102), GzmB (AKYP0102) and S100B (#42397, Cell Signaling Technology). Initial T-cell quantification as performed utilizing HALO AI 3.6 with default AI based cell sequencing and manual gating of T-cell phenotypes. Subsequent broad immunophenotyping was performed with cell segmentation within StarDist using the DAPI channel (cytoplasm segmentation was estimated by morphological dilation of 5 µm), and cell phenotyping for CD4+ and CD8+ T cells was performed using the machine learning classifier in QuPath v0.4.44. Cell neighborhood enrichment analysis was performed using a graph-based connectivity algorithm with the Squidy Python package5. Cell proximity within spatial neighborhoods is quantified with a permutation-based test (default is 1000) by comparing the spatial location of cell types and their relative distances.

**TCR Pan-clonality Assay**

DNA target amplification (200 ng gDNA input), partial digestion, barcoding of amplicons and purification was performed according to the manufacturer’s protocol (Oncomine Human Immune Repertoire user guide for TCR Pan-clonality assay (Thermofisher)). The barcoding set consisted of IonTorrent Dual Barcode Kit 1–96 (Thermofisher). Target amplification was for 31 cycles.

Purified libraries were quantified by qPCR using an Ion Library TaqMan Quantitation Kit (Thermofisher) according to the Oncomine Human Immune Repertoire user guide. A 1:100 dilution of each sample library was analysed in each case. qPCR was performed using a Quantstudio 7 pro qPCR system (Thermofisher) in standard run mode (Oncomine Human Immune Repertoire user guide). Individual barcoded libraries were diluted to a final concentration of 50 pM in nuclease free water using Eppendorf DNA LoBind microcentrifuge tubes (Sigma-Aldrich). For each sequencing chip, equal volumes (5 µl) of 12 diluted library samples were combined on ice. Subsequently, 25 µl of the pooled libraries were used for template preparation and chip loading.

The sequencing workflow consisted of template preparation and sequencing chip loading on an Ion Chef instrument (Life Technologies, Carlsbad, CA, USA), sequencing on an Ion GeneStudio S5 plus system (Life Technologies, Carlsbad, CA, USA) followed by data analysis. Planned sequencing runs were based on the Oncomine TCR Pan-Clonality Assay using Torrent Suite Software version 5.18.1. The kits used for each planned sequencing run were an Ion 550 kit-Chef, Ion S5 sequencing kit and Ion 550 chip (Thermofisher). Sequencing data was automatically uploaded to Ion reporter software version 5.18.4 for analysis using the Oncomine TCR Beta-SR and Gamma-SR - w1.4 - DNA - Single Sample workflow. Multi-sample analysis was based on join CDR3 NT.

Clonotypes were defined using V, J and CDR3 amino acid sequence from TRB and TRG clone summaries from ThermoFisher Ion Torrent targeted NGS assay. Non-productive clonotypes, based on the ‘Functionality’ field, were excluded from analysis. Productive clonotype frequency was calculated based on the total number of reads for a clonotype divided by the total number of productive reads in the sample.

Clonotype diversity Shannon entropy (H) was calculated based on the clonotype abundances within each sample using H = -Σpi * ln(pi)6. Maximum Shannon diversity was calculated as ln(total clonotypes). The Shannon equitability or evenness was calculated as H/(max diversity). Distribution of clonotypes within each sample clonotypes were ranked by their frequency from largest to smallest using min_rank from the dplyr R package7. The min_rank approach given every tie the same (smallest) value. The cumulative frequency for the ranked clonotypes within each sample was calculated using the cumsum function from base R. Data analysis was performed in R version 4.3.0 (2023-04-21) using RStudio version 4.3.08 [with the following R packages; tidyverse version 2.0.09, ggpubr10, ggsci version 3.0.011, lemon version 0.4.9 12 and UpSetR version 1.4.0 13]

**Proximity Extension Assays**

Plasma samples collected pre- (Day -4), and post- (Day +7 and Day +12) ICI treatment were analyzed using proximity extension assay at the Olink Proteomics facility at Uppsala, Sweden. In total, 725 immuno-oncology-related protein biomarkers (Olink Explore 384 Inflammation, Olink Explore 384 Oncology (www.olink.com)) were measured and reported as normalized protein expression (NPX) values, which is an arbitrary unit on a log2-scale where a higher value corresponds to a higher protein expression.

**Circulating Tumor Cell Analysis**

7.5 mL of whole blood samples were processed using the AccuCyte-CyteFinder platform (RareCyte), as previously described. 14 Briefly, nucleated blood cells were isolated using AccuCyte (RareCyte) and spread onto 8 Superfrost® Plus slides (ThermoFisher Scientific). Slides were immunofluorescently stained on the Autostainer Link 48 (Dako–Agilent Technologies) using anti-GFAP antibody (AF488; 560297, Becton Dickinson*)*, anti-EGFR antibody (PE; FAB9577P, R&D), anti-CD45 antibody (AF750; NBP1-79127AF750, Novus Biologicals), anti-CD66b antibody (AF750; FAB42462, R&D), and a nuclear DAPI dye (ThermoFisher Scientific). Slides were then scanned on the CyteFinder HT (RareCyte) digital immunofluorescent microscope at 10X magnification at exposure times: 0.05s (DAPI), 0.01s (GFAP), 0.1s (EGFR), 0.1s (CK) and 0.1s (CD45/CD66b). Image files were analyzed by an automated software and presented to the reviewer for CTC confirmation (CyteMapper, RareCyte). A CTC was defined as positive for DAPI and GFAP, and negative for CD45/CD66b (mean fluorescence intensity cut-off: 15).

**References**

1 Mann, G. B. *et al.* Postoperative radiotherapy omission in selected patients with early breast cancer following preoperative breast MRI (PROSPECT): primary results of a prospective two-arm study. *Lancet* **403**, 261-270 (2024). https://doi.org:10.1016/s0140-6736(23)02476-5

2 Lee, J. H. *et al.* Transcriptional downregulation of MHC class I and melanoma de- differentiation in resistance to PD-1 inhibition. *Nat Commun* **11**, 1897 (2020). https://doi.org:10.1038/s41467-020-15726-7

3 Black, S. *et al.* CODEX multiplexed tissue imaging with DNA-conjugated antibodies. *Nat Protoc* **16**, 3802-3835 (2021). https://doi.org:10.1038/s41596-021-00556-8

4 Bankhead, P. *et al.* QuPath: Open source software for digital pathology image analysis. *Sci Rep* **7**, 16878 (2017). https://doi.org:10.1038/s41598-017-17204-5

5 Palla, G. *et al.* Squidpy: a scalable framework for spatial omics analysis. *Nat Methods* **19**, 171-178 (2022). https://doi.org:10.1038/s41592-021-01358-2

6 Shannon, C. E. A Mathematical Theory of Communication. *Bell System Technical Journal* **27**, 379-423 (1948). https://doi.org:https://doi.org/10.1002/j.1538-7305.1948.tb01338.x

7 dplyr: A Grammar of Data Manipulation. R package version 1.1.4, <https://github.com/tidyverse/dplyr>, <https://dplyr.tidyverse.org>. (2023).

8 R: A Language and Environment for Statistical Computing_. R

Foundation for Statistical Computing, Vienna, Austria. <<https://www.R-project.org/>>. (2023).

9 Wickham, H. *et al.* Welcome to the Tidyverse. . *Journal of Open Source Software* **4**, 1686 (2019).

10 Ggpubr: ‘Ggplot2’ Based Publication Ready Plots. (<https://cran.r-project.org/web/packages/ggpubr/index.html>, 2022).

11 _ggsci: Scientific Journal and Sci-Fi Themed Color Palettes for

'ggplot2'_. R package version 3.0.0, <<https://CRAN.R-project.org/package=ggsci>>. (2023).

12 lemon: Freshing Up your 'ggplot2' Plots_. R package version 0.4.9,

<<https://CRAN.R-project.org/package=lemon>>. ( 2024 ).

13 UpSetR: A More Scalable Alternative to Venn and Euler Diagrams for Visualizing Intersecting Sets_. R package version 1.4.0, <<https://CRAN.R-project.org/package=UpSetR>>. (2019).

14 Yeo, D. *et al.* Accurate isolation and detection of circulating tumor cells using enrichment-free multiparametric high resolution imaging. *Front Oncol* **13**, 1141228 (2023). https://doi.org:10.3389/fonc.2023.1141228

15 McCord, M. *et al.* The efficacy of DNA mismatch repair enzyme immunohistochemistry as a screening test for hypermutated gliomas. *Acta Neuropathol Commun* **8**, 15 (2020). https://doi.org:10.1186/s40478-020-0892-2
